# Supplementary material
Source: PubMed Central journal article supplement (PMC4730582)
Supplement: IAI.00870-15_zii999091559so1.pdf [file IAI.00870-15_zii999091559so1.pdf]

Table S1. Oligonucleotides used for cloning toxin domains of *C. difficile* VPI10463

| Toxin and fragment | Primer       | Sequence <sup>b</sup>                                                                   | Amino acids <sup>a</sup> |
|--------------------|--------------|-----------------------------------------------------------------------------------------|--------------------------|
| Toxin A fragment 1 | TxA-frag1-Fw | <u>agccatggg</u> ttaatatctaagaagagttaataaaactcgcatatagc                                 | 1 - 669                  |
|                    | TxA-frag1-Rv | <u>ccggatcc</u> cacttaatctagcaaattcgcttggtgaattcatctttacc                               |                          |
| Toxin A Fragment 2 | TxA-frag2-Fw | <u>agccatggg</u> cgtaacctttattggacatggtaaagatgaattcaacacaagcgaattgctag                  | 649 - 1265               |
|                    | TxA-frag2-Rv | <u>ccggatcc</u> gtaaaatttacctgggtataaatctcttattgaatcaagtaatc                            |                          |
| Toxin A fragment 3 | TxA-frag3-Fw | <u>agccatggg</u> cgaaaatgacggaactagattacttgattcaataagagatttatacccagg                    | 1245 - 1848              |
|                    | TxA-frag3-Rv | <u>ccggatcc</u> aaattctatagatcaaaatagaataatgaattatttatattgattaatcc                      |                          |
| Toxin A fragment 4 | TxA-frag4-Fw | <u>agccatggg</u> cttagttaaaggattaatcaatataaataattcattattctatttgatcc                     | 1828 - 2710              |
|                    | TxA-frag4-Rv | <u>ccggatcc</u> gcatatatcccagggctttactccatcaacacc                                       |                          |
| Toxin B fragment 1 | TxB-frag1-Fw | <u>agccatggg</u> cttagttaatagaaaacagttagaaaaatggcaaatgtaag                              | 1 - 602                  |
|                    | TxB-frag1-Rv | <u>ggctcgag</u> cttacctagggcgttcatctctatgtctgtataggatccaggagtctttgcaataagttacatgctgcttc |                          |
| Toxin B fragment 2 | TxB-frag2-Fw | <u>agccatggg</u> ccagttacaaggagataaaattagttatgaagcagcatg                                | 582 - 1194               |
|                    | TxB-frag2-Rv | <u>ccggatcc</u> tgttattgatgggtctgaaaagaagtgatctatatcatcag                               |                          |
| Toxin B fragment 3 | TxB-frag3-Fw | <u>agccatggg</u> cggttcaggtcactactgtaactgatgatatagatcacttc                              | 1174 - 1786              |
|                    | TxB-frag3-Rv | <u>ccggatcc</u> catcactaaagttaaagatagcttatttgccaaagtcttatc                              |                          |
| Toxin B fragment 4 | TxB-frag4-Fw | <u>agccatggg</u> cttcgtaatgttttaagataagactttggcaataagc                                  | 1766 - 2366              |
|                    | TxB-frag4-Rv | <u>ccggatcc</u> cttactaatcactaattgagctgtatcaggatcaaaataatac                             |                          |

<sup>a</sup> Corresponding amino acids sequence of toxin cloned on fragment. All toxin fragments are cloned to give a 20 amino acid overlap between adjacent toxin domains.

<sup>b</sup> Underlined sequence indicates the restriction sites introduced for cloning.

Table S2. Strains and plasmids used in study

| Strain or plasmid | Relevant properties                                                          | Reference or source |
|-------------------|------------------------------------------------------------------------------|---------------------|
| Plasmids          |                                                                              |                     |
| pKA432            | pET28a with <i>C. difficile</i> toxin A catalytic domain (fragment 1)        | This work           |
| pKA433            | pET28a with <i>C. difficile</i> toxin A translocation domain (fragment 2)    | This work           |
| pKA434            | pET28a with <i>C. difficile</i> toxin A translocation domain (fragment 3)    | This work           |
| pKA435            | pET28a with <i>C. difficile</i> toxin A receptor binding domain (fragment 4) | This work           |
| pKA436            | pET28a with <i>C. difficile</i> toxin B catalytic domain (fragment 1)        | This work           |
| pKA437            | pET28a with <i>C. difficile</i> toxin B translocation domain (fragment 2)    | This work           |
| pKA438            | pET28a with <i>C. difficile</i> toxin B translocation domain (fragment 3)    | This work           |
| pKA439            | pET28a with <i>C. difficile</i> toxin B receptor binding domain (fragment 4) | This work           |
| pAF100            | Expression plasmid for secreted expression in lactobacilli                   | (31)                |
| pAF900            | Expression plasmid for cell wall anchored expression in lactobacilli         | (31)                |
| pKA498            | pAF100 with VHH-B2 inserted for secreted expression                          | This work           |
| pKA452            | pAF100 with VHH-E2 inserted for secreted expression                          | This work           |
| pKA453            | pAF100 with VHH-G3 inserted for secreted expression                          | This work           |
| pKA500            | pAF100 with VHH-D8 inserted for secreted expression                          | This work           |
| pKA456            | pAF100 with VHH-G1 inserted for cell wall anchored expression                | This work           |
| pKA458            | pAF100 with VHH-D2 inserted for cell wall anchored expression                | This work           |
| pKA461            | pAF100 with VHH-B5 inserted for cell wall anchored expression                | This work           |
| pKA463            | pAF100 with VHH-G9 inserted for cell wall anchored expression                | This work           |
| pKA457            | pAF100 with VHH-B2 inserted for cell wall anchored expression                | This work           |
| pKA459            | pAF100 with VHH-E2 inserted for cell wall anchored expression                | This work           |
| pKA460            | pAF100 with VHH-G3 inserted for cell wall anchored expression                | This work           |
| pKA462            | pAF100 with VHH-D8 inserted for cell wall anchored expression                | This work           |
| Strains           |                                                                              |                     |
| KKA370            | <i>E. coli</i> BL21 with plasmid pKA432                                      | This work           |
| KKA371            | <i>E. coli</i> BL21 with plasmid pKA433                                      | This work           |
| KKA372            | <i>E. coli</i> BL21 with plasmid pKA433                                      | This work           |
| KKA373            | <i>E. coli</i> BL21 with plasmid pKA434                                      | This work           |
| KKA374            | <i>E. coli</i> BL21 with plasmid pKA435                                      | This work           |

|                                         |                                                                                      |           |
|-----------------------------------------|--------------------------------------------------------------------------------------|-----------|
| KKA375                                  | <i>E. coli</i> BL21 with plasmid pKA436                                              | This work |
| KKA376                                  | <i>E. coli</i> BL21 with plasmid pKA437                                              | This work |
| KKA377                                  | <i>E. coli</i> BL21 with plasmid pKA438                                              | This work |
| <i>L. paracasei</i> BL23                | Previously considered a plasmid-free <i>L. casei</i> 393 strain                      | (23)      |
| KKA101                                  | <i>L. paracasei</i> BL23 harbouring empty expression plasmid                         | (33)      |
| KKA382                                  | <i>L. paracasei</i> BL23 with plasmid pKA453, secreted VHH-G3                        | This work |
| KKA440                                  | <i>L. paracasei</i> BL23 with plasmid pKA452, secreted VHH-E2                        | This work |
| KKA441                                  | <i>L. paracasei</i> BL23 with plasmid pKA500, secreted VHH-D8                        | This work |
| KKA442                                  | <i>L. paracasei</i> BL23 with plasmid pKA498, secreted VHH-B2                        | This work |
| KKA412                                  | <i>L. paracasei</i> BL23 with plasmid pKA457, cell wall anchored VHH-G1              | This work |
| KKA414                                  | <i>L. paracasei</i> BL23 with plasmid pKA457, cell wall anchored VHH-D2              | This work |
| KKA417                                  | <i>L. paracasei</i> BL23 with plasmid pKA457, cell wall anchored VHH-B5              | This work |
| KKA419                                  | <i>L. paracasei</i> BL23 with plasmid pKA457, cell wall anchored VHH-G9              | This work |
| KKA413                                  | <i>L. paracasei</i> BL23 with plasmid pKA457, cell wall anchored VHH-B2              | This work |
| KKA415                                  | <i>L. paracasei</i> BL23 with plasmid pKA459, cell wall anchored VHH-E2              | This work |
| KKA416                                  | <i>L. paracasei</i> BL23 with plasmid pKA460, cell wall anchored VHH-B3              | This work |
| KKA418                                  | <i>L. paracasei</i> BL23 with plasmid pKA462, cell wall anchored VHH-D8              | This work |
| <i>C. difficile</i> 630 (tcdA-,tcdB+)   | Toxin A negative and toxin B positive strain of <i>C. difficile</i> 630 $\Delta$ erm | (8)       |
| <i>E. coli</i> DH5 $\alpha$             |                                                                                      |           |
| <i>E. coli</i> BL21-CodonPlus(DE3)-RIPL |                                                                                      |           |

---

Table S3. Progression of infection in hamsters

| Groups                                                                    | Hamster no | 1. Day                 | 2. Day                   | 3. Day                                     | 4. Day                                      | 5. Day                                     |
|---------------------------------------------------------------------------|------------|------------------------|--------------------------|--------------------------------------------|---------------------------------------------|--------------------------------------------|
| Spores only                                                               | 58-1       | GDH negative<br>-<br>- | GDH negative<br>-<br>-   | GDH positive<br>Toxin positive<br>Wet tail | Death                                       |                                            |
|                                                                           | 58-2       | GDH negative<br>-<br>- | GDH negative<br>-<br>-   | GDH negative<br>-<br>-                     | GDH positive<br>Toxin positive<br>Wet tail  | Death                                      |
|                                                                           | 58-3       | GDH negative<br>-<br>- | GDH negative<br>-<br>-   | GDH positive<br>Toxin positive<br>Wet tail | Death                                       |                                            |
|                                                                           | 58-4       | GDH negative<br>-<br>- | GDH negative<br>-<br>-   | GDH positive<br>Toxin positive<br>Wet tail | Death                                       |                                            |
|                                                                           | 58-5       | GDH negative<br>-<br>- | GDH negative<br>-<br>-   | GDH positive<br>Toxin positive<br>Wet tail | Death                                       |                                            |
|                                                                           | 58-6       | GDH negative<br>-<br>- | GDH negative<br>-<br>-   | GDH positive<br>Toxin positive<br>Wet tail | Death                                       |                                            |
| 5x10 <sup>9</sup> CFU<br>KKA413<br>and<br>5x10 <sup>9</sup> CFU<br>KKA416 | 54-1       | GDH negative<br>-<br>- | GDH negative<br>-<br>-   | GDH positive<br>Toxin negative<br>Wet tail | GDH positive<br>Toxin negative<br>Wet tail  | N.D<br>Toxin negative<br>Wet tail          |
|                                                                           | 54-2       | GDH negative<br>-<br>- | GDH positive<br>N.D<br>- | GDH positive<br>Toxin negative<br>Wet tail | GDH positive<br>Toxin negative<br>Wet tail  | N.D<br>Toxin negative<br>Wet tail          |
|                                                                           | 54-3       | GDH negative<br>-<br>- | GDH negative<br>-<br>-   | GDH positive<br>Toxin negative<br>Wet tail | GDH positive<br>Toxin positive<br>Wet tail  | Death                                      |
|                                                                           | 54-4       | GDH negative<br>-<br>- | GDH negative<br>-<br>-   | GDH negative<br>-<br>-                     | GDH positive<br>Toxin positive<br>Wet tail  | Death                                      |
|                                                                           | 54-5       | GDH negative<br>-<br>- | GDH negative<br>-<br>-   | GDH negative<br>-<br>-                     | GDH positive<br>Toxin negative<br>Wet tail  | GDH positive<br>Toxin positive<br>Wet tail |
|                                                                           | 54-6       | GDH negative<br>-<br>- | GDH negative<br>-<br>-   | GDH negative<br>-<br>-                     | GDH positive<br>Toxin positive<br>Wet tail  | Death                                      |
| 1x10 <sup>10</sup> CFU<br>KKA101                                          | 53-1       | GDH negative<br>-<br>- | GDH negative<br>-<br>-   | GDH negative<br>-<br>-                     | GDH positive<br>Toxin positive - Death<br>- |                                            |
|                                                                           | 53-2       | GDH negative<br>-<br>- | GDH negative<br>-<br>-   | GDH positive<br>Toxin positive<br>Wet tail | Death                                       |                                            |
|                                                                           | 53-3       | GDH negative<br>-<br>- | GDH negative<br>-<br>-   | GDH positive<br>Toxin negative<br>Wet tail | GDH positive<br>Toxin positive<br>Wet tail  | Death                                      |
|                                                                           | 53-4       | GDH negative<br>-<br>- | GDH negative<br>-<br>-   | GDH positive<br>Toxin positive<br>Wet tail | Death                                       |                                            |
|                                                                           | 53-5       | GDH negative<br>-<br>- | GDH negative<br>-<br>-   | GDH positive<br>Toxin positive<br>Wet tail | Death                                       |                                            |
|                                                                           | 53-6       | GDH negative<br>-<br>- | GDH negative<br>-<br>-   | GDH positive<br>Toxin positive<br>Wet tail | Death                                       |                                            |

Markers for the progression of infection for hamsters receiving: *C. difficile* spores only; *C. difficile* spores and engineered *L. paracasei* BL23 expressing cell wall anchored anti-toxin B neutralizing VHH fragments B2 and G3 (strain KKA413 and KKA416); or *C. difficile* spores and non-expressing *L. paracasei* BL23 (strain KKA101). Glutamate Dehydrogenase (GDH) was measured by ELISA in fecal droppings as a marker for spore germination and presence of vegetative *C. difficile*. Presence of toxins in the feces were detected by an ELISA for toxin B as marker of onset of virulence. Episodes of diarrhea were observed through the presence of wet tail. (-) No sample taken as feces were still GDH negative. (ND) measurement not done.

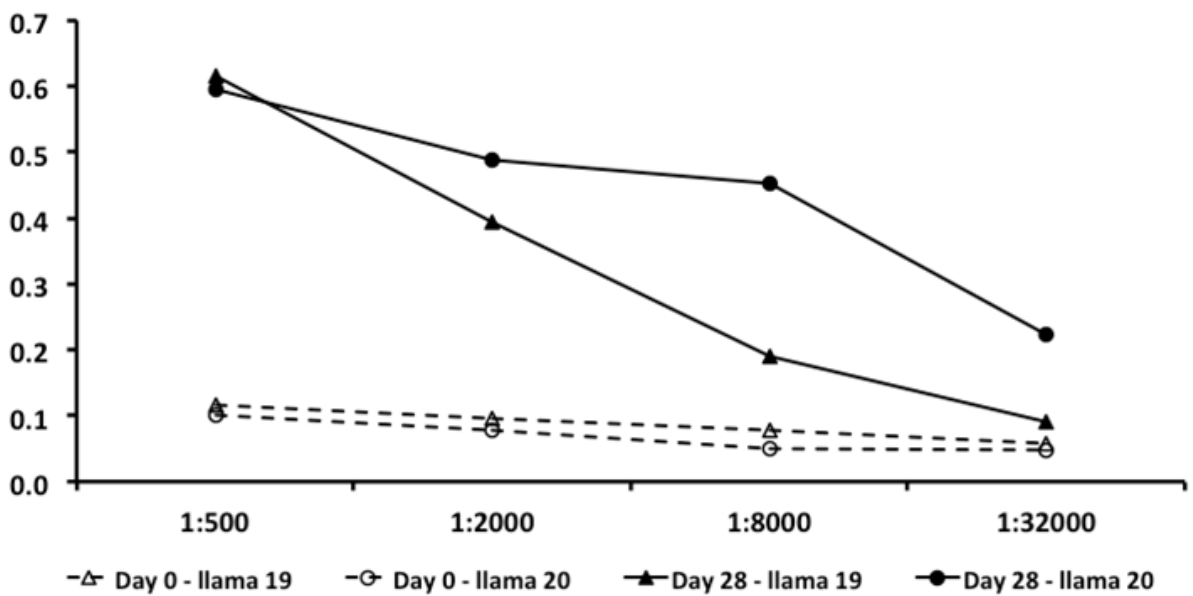

Figure S1. Analysis of serum antibody responses in llamas immunized with *C. difficile* toxin B. Fourfold dilution range of pre-immune sera (day 0) and sera taken after third immunization (day 28) of llama 19 and 20 analyzed for binding to toxin B.

## Secreted:

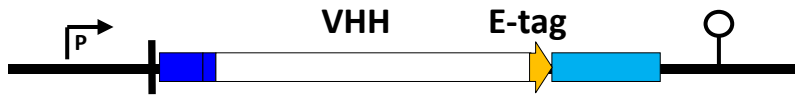

## Cell wall anchored:

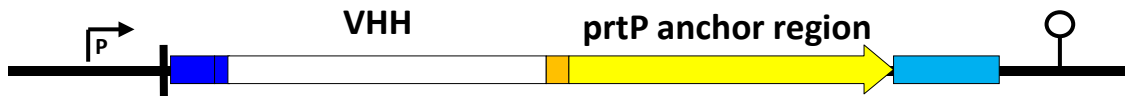

Figure S2. Plasmid constructs for expression of VHH fragments in *L. paracasei* BL23. The expression plasmids based on the expression cassette of the *apf* gene from *L. crispatus* M247. The inclusion of a PrtP anchoring domain and placement of the stop codon gives either secreted expression or cell wall anchoring of the VHH fragment. The APF promoter (P), APF signal peptide (blue), VHH (white), prtP anchor (yellow), E-tag (orange), translational stop codon (arrowhead), non-translated APF anchoring domain (light blue) and transcriptional terminator (lollipop) are indicated.

(A)

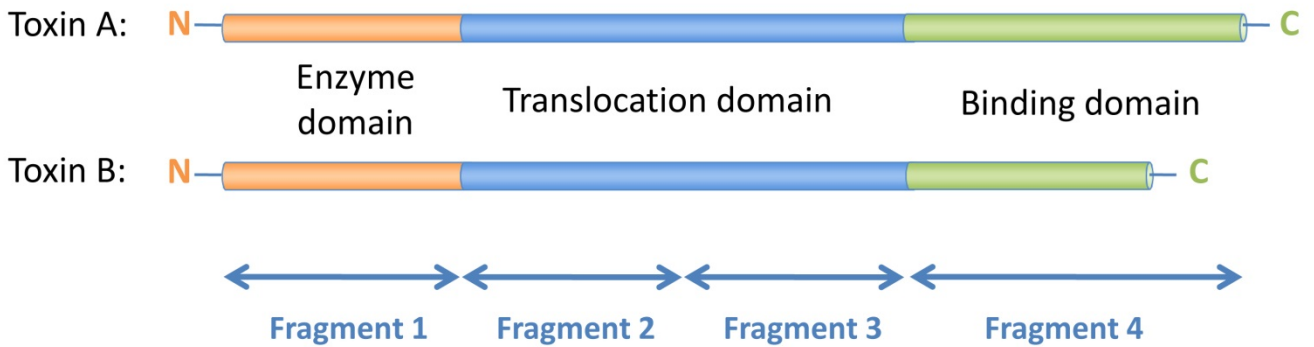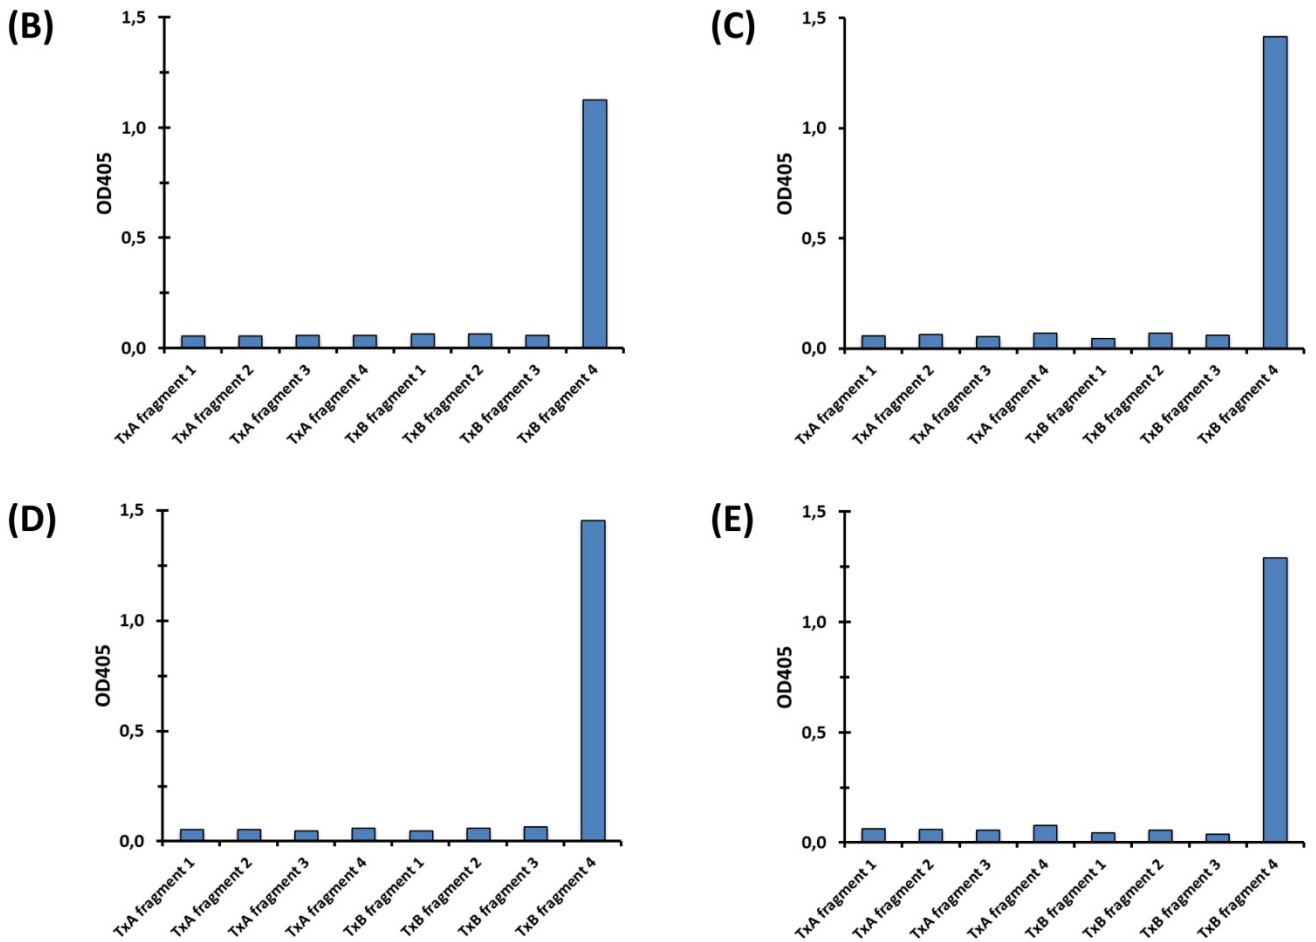

Figure S3. Mapping of domain specificity of *L. paracasei* BL23 produced anti-toxin B VHH on toxin A and toxin B. (A) Schematic representation of the toxin A and toxin B domains and the corresponding recombinant fragments produced in *E. coli*. (B) All tested VHH fragments (VHH-B2, VHH-E2, VHH-G3, VHH-D8) bind to the toxin B fragment 4, corresponding to the C-terminal receptor binding domain.

**(A)**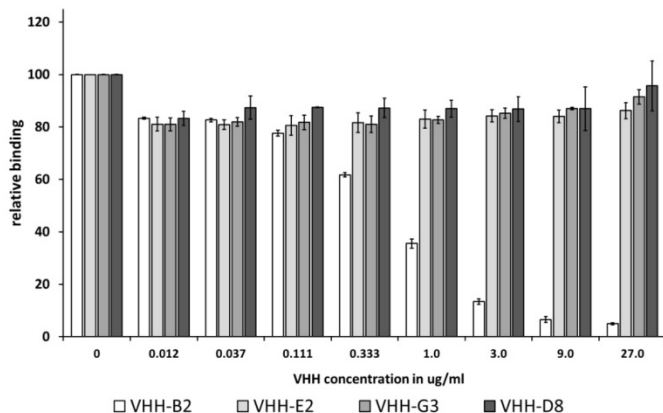**(B)**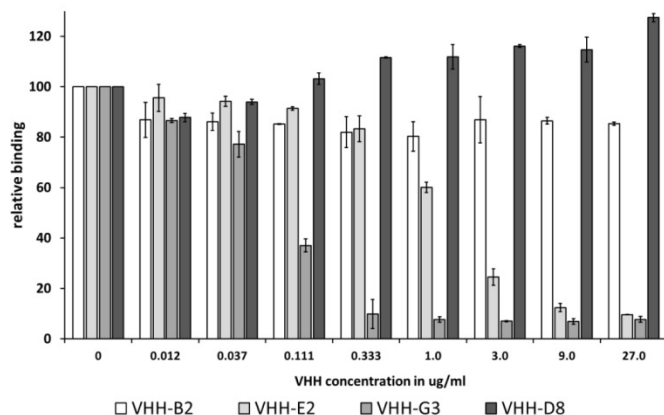**(C)**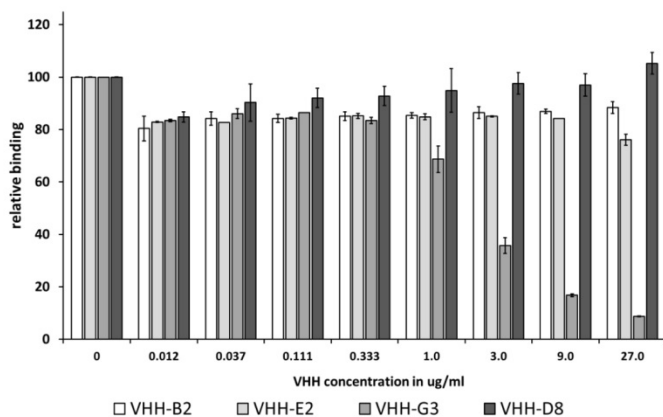**(D)**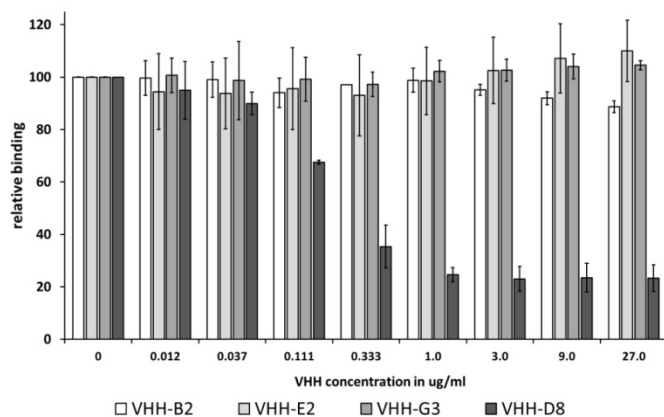

Figure S4. Epitope competition of toxin B neutralizing VHH fragments detected by ELISA. Binding of *Lactobacillus* produced VHH fragments to toxin B as coating antigen competed with purified *E. coli* produced VHH fragments in threefold dilutions. Binding was detected through the E-tag fused to the *Lactobacillus* produced VHH. (A) VHH-B2 produced by strain KKA442. (B) VHH-E2 produced by strain KKA440. (C) VHH-G3 produced by strain KKA382. (D) VHH-D8 produced by strain KKA441.



**(A) VHH-B2**

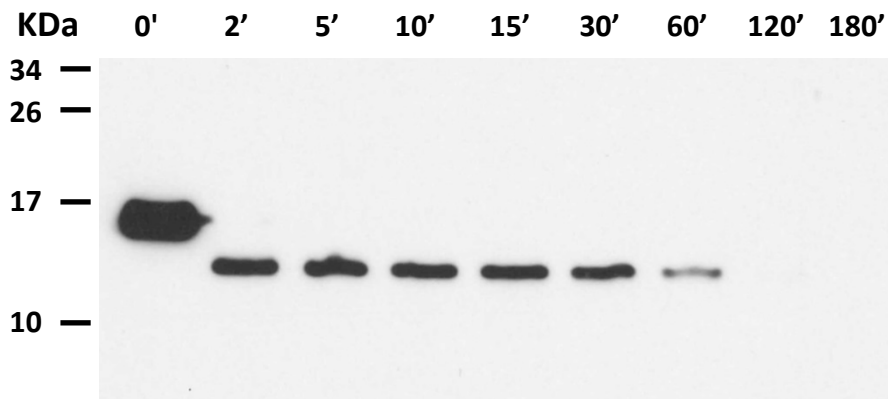

**(B) VHH-G3**

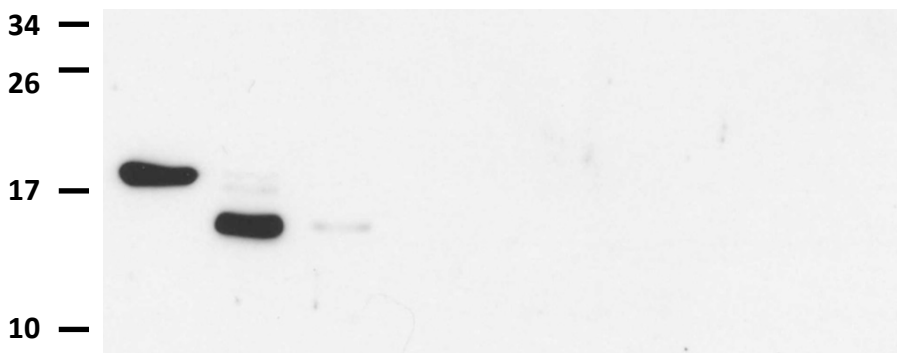

**(C) ARP1**

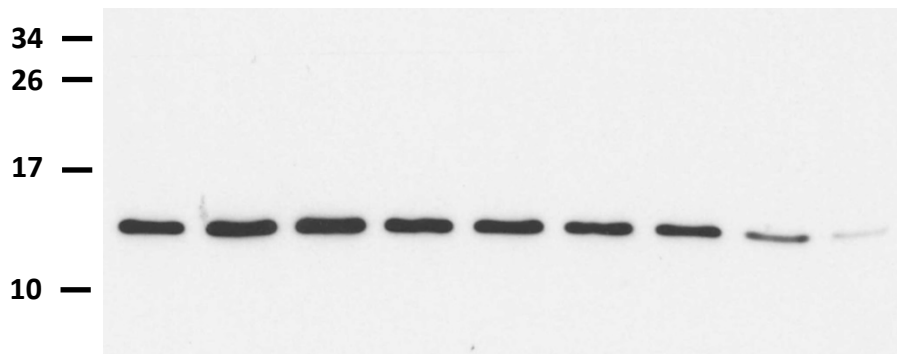

Figure S5. Proteolytic stability of toxin B neutralizing VHH fragments against intestinal proteases. Detection of degradation of VHH fragments exposed to hamster intestinal extracts by immunoblotting using an anti-VHH antibody. Western blotting of (A) anti-toxin B VHH-B2 and (B) anti-toxin B VHH-G3 exposed to hamster intestinal proteases for up to 180 minutes. (C) With anti-rotavirus VHH, ARP1, as control for relative stability of the VHH fragments.
